# Supplementary material for: Unsupervised Clustering-Assisted Method for Consensual Quantitative Analysis of Methanol–Gasoline Blends by Raman Spectroscopy
Source: MDPI journal article supplement (doi:10.3390/molecules29071427), 2024-03-22
Supplement: s1 [file s1]

Table S1. The methanol content in the methanol-gasoline blends listed as follows:

| gas station | 92#                  | 95#                  | 98#                  |
|-------------|----------------------|----------------------|----------------------|
| 1           | 0%, 2%, 4%,..., 30%. | 0%, 2%, 4%,..., 30%. | 0%, 2%, 4%,..., 30%. |
| 2           | 0%, 2%, 4%,..., 30%. | 0%, 2%, 4%,..., 30%. | 0%, 2%, 4%,..., 30%. |
| 3           | 0%, 2%, 4%,..., 30%. | 0%, 2%, 4%,..., 30%. | 0%, 2%, 4%,..., 30%. |
| 4           | 0%, 2%, 4%,..., 30%. | 0%, 2%, 4%,..., 30%. | 0%, 2%, 4%,..., 30%. |
| 5           | 0%, 2%, 4%,..., 30%. | 0%, 2%, 4%,..., 30%. | 0%, 2%, 4%,..., 30%. |
| 6           | 0%, 2%, 4%,..., 30%. | 0%, 2%, 4%,..., 30%. | 0%, 2%, 4%,..., 30%. |
